# Supplementary material for: Discovery of a novel fungal Tc toxin complex and a functional myco- serpin via a unique two-by-two comparative genomics pipeline
Source: Research Square preprint supplement (doi:10.21203/rs.3.rs-6005389/v1), 2025-03-21
Supplement: Supplementary file 2 [file 52bafadbc6271a8811d76e6c.xlsx]

## Sheet: Sheet1
Species	Cluster ID	Proteins in cluster	Swiss-Prot Hit (Entry - Species)	Swiss-Prot Hit Protein Name	GO Annotation	Members of Cluster	Function	Ref
B.bassiana	cluster11473	2	P96155 - Vibrio furnissii	Beta-hexosaminidase	GO:0000272; P:polysaccharide catabolic process; IEA:UniProtKB-KW	Bb_ERL836|KAF1736194.1; Bb_JEF-350|KAH8711778.1	Hydrolyzes aryl-N-acetyl-beta-D-glucosaminide (aryl-beta-GlcNAc), aryl-beta-GalNAc and chitin oligosaccharides	46
	cluster10670	3	A0A0B4GDU5 - Metarhizium brunneum	Scytalone dehydratase-like protein Arp1	GO:0006582; P:melanin metabolic process; IEA:InterPro	Bb_ERL836|KAF1733572.1; Bb_ERL836|KAF1738187.1; Bb_JEF-350|KAH8712333.1	Scytalone dehydratase-like protein; part of the Pks2 gene cluster that mediates the formation of infectious structures (appressoria), enabling these fungi to kill insects faster	41
	cluster11588	2	A0A024FA41 - Lecanicillium sp	Fatty acid hydroxylase vlmA	GO:0009405; P:pathogenesis; IEA:UniProtKB-KW	Bb_ERL836|KAF1739130.1; Bb_JEF-350|KAH8720364.1	Fatty acid hydroxylase; part of the gene cluster that mediates the biosynthesis of verlamelin, a lipopeptide that exhibits antifungal activity against plant pathogenic fungi	47
	cluster11353	2	I7LRH3 - Penicillium brevicompactum	Cytochrome P450 monooxygenase mpaDE	GO:0016114; P:terpenoid biosynthetic process; IEA:UniProtKB-UniPathway	Bb_ERL836|KAF1734326.1; Bb_JEF-350|KAH8709173.1	Cytochrome P450 monooxygenase; part of the gene cluster that mediates the biosynthesis of mycophenolic acid (MPA), the first isolated antibiotic natural product in the world obtained from a culture of Penicillium brevicompactum in 1893	48
	cluster9087	6	P17635 - Oryctolagus cuniculus (Rabbit)	Dimethylaniline monooxygenase [N-oxide-forming]	GO:0070995; P:NADPH oxidation; ISS:UniProtKB	Bb_ERL836|KAF1732516.1; Bb_JEF-350|KAH8713540.1; Bb_JEF-350|KAH8713541.1; Bb_JEF-350|KAH8715427.1; Bb_JEF-350|KAH8715429.1; Bb_JEF-350|KAH8715496.1	Catalyzes the oxidative metabolism of numerous xenobiotics, including mainly therapeutic drugs and insecticides that contain a soft nucleophile, most commonly nitrogen and sulfur and participates to their bioactivation	49
C.cateniannulata	cluster10828	3	B1GVX7 - Botryotinia fuckeliana	Reducing polyketide synthase BOA6	GO:0009405; P:pathogenesis; IEA:UniProtKB-KW	Cc_FRD24|FRD24_009204-T1; Cc_MBC234|CcateniannulataMCB234_005637-T1; Cc_MBC234|CcateniannulataMCB234_005638-T1	Cytochrome P450 monooxygenase; part of the gene cluster A that mediates the biosynthesis of botcinic acid and its botcinin derivatives, acetate-derived polyketides that contribute to virulence when combined with the sesquiterpene botrydial. Botcinic acid and its derivatives have been shown to induce chlorosis and necrosis during host plant infection, but also have antifungal activities	50
	cluster10794	3	C8VJR7 - Emericella nidulans	Highly reducing polyketide synthase alnA	GO:0019748; P:secondary metabolic process; NAS:AspGD	Cc_FRD24|FRD24_004163-T1; Cc_FRD24|FRD24_004164-T1; Cc_MBC234|CcateniannulataMCB234_009446-T1	Highly reducing polyketide synthase; part of the gene cluster that mediates the biosynthesis of asperlin, a polyketide showing anti-inflammatory, antitumor and antibiotic activities	51
	cluster11787	2	D4ALG0 - Arthroderma benhamiae	LysM domain-containing protein ARB_05157	GO:0009405; P:pathogenesis; IEA:UniProtKB-KW	Cc_FRD24|FRD24_003435-T1; Cc_MBC234|CcateniannulataMCB234_002724-T1	Might have a role in sequestration of chitin oligosaccharides (breakdown products of fungal cell walls that are released during invasion and act as triggers of host immunity) to dampen host defense.	52
	cluster11938	2	K0E4D9 - Aspergillus rugulosus	ABC transporter ecdL	GO:0042626; F:ATPase activity, coupled to transmembrane movement of substances; IEA:InterPro	Cc_FRD24|FRD24_008693-T1; Cc_MBC234|CcateniannulataMCB234_009760-T1	ABC transporter; part of the gene cluster that mediates the biosynthesis of echinocandin B, a fungal lipidated cyclic hexapeptide that acts as an antifungal agent	53
	cluster11974	2	Q0C8A5 - Aspergillus terreus	FAD-binding monooxygenase trt3	GO:0016114; P:terpenoid biosynthetic process; IEA:UniProtKB-UniPathway	Cc_FRD24|FRD24_010108-T1; Cc_MBC234|CcateniannulataMCB234_000603-T1	FAD-binding monooxygenase; part of the gene cluster that mediates the biosynthesis of terretonin, a fungal meroterpenoid that acts as a mycotoxin	54
	cluster10850	3	Q2UPC0 - Aspergillus oryzae	ABC transporter aclQ	GO:0036246; P:phytochelatin 2 import into vacuole; IEA:EnsemblFungi	Cc_FRD24|FRD24_010701-T1; Cc_MBC234|CcateniannulataMCB234_011294-T1; Cc_MBC234|CcateniannulataMCB234_011387-T1	ABC transporter; part of the gene cluster that mediates the biosynthesis of aspirochlorine (or antibiotic A30641), an unusual halogenated spiro compound with distinctive antifungal properties due to selective inhibition of protein biosynthesis, and which is also active against bacteria, viruses, and murine tumor cells	55
	cluster11919	2	Q9C1B8 - Fusarium sporotrichioides	Acetyltransferase TRI7	GO:0016746; F:transferase activity, transferring acyl groups; IEA:UniProtKB-KW	Cc_FRD24|FRD24_008010-T1; Cc_MBC234|CcateniannulataMCB234_000191-T1	Acetyltransferase; part of the core gene cluster that mediates the biosynthesis of trichothecenes, a very large family of chemically related bicyclic sesquiterpene compounds acting as mycotoxins, including T2-toxin	56
C. fumosorosea	cluster12044	2	A1A653 - Ustilago maydis	Fe-regulated protein 8	GO:0009405; P:pathogenesis; IEA:UniProtKB-KW	Cf_2679|OAA52142.1; Cf_grCorFumo1|OY7_004342-T1	Protein of unknown function; part of the gene cluster that mediates the biosynthesis of siderophore ferrichrome A which is contributing to organismal virulence	57
	cluster12069	2	D4ATD1 - Arthroderma benhamiae	Extracellular metalloprotease ARB_07495	GO:0009405; P:pathogenesis; IEA:UniProtKB-KW	Cf_2679|OAA53338.1; Cf_grCorFumo1|OY7_009518-T1	Secreted metalloproteinase that allows assimilation of proteinaceous substrates. Plays a pivotal role as a pathogenicity determinant during infections and contributes to the ability of the pathogen to persist within the mammalian host	-
C. javanica	cluster12303	2	Q4WB37 - Aspergillus fumigatus	Endo-chitosanase	GO:0000272; P:polysaccharide catabolic process; IEA:UniProtKB-KW	Cj_Apopka97|V2A60_003491-T1; Cj_IJ2G|TQW07355.1	Chitosanase catalyzing the endo-type cleavage of chitosan, the deacylated form of chitin. Chitosanase may be crucial in the degradation of the deacetylated portion of chitin in the fungal cell wall	-
	cluster12283	2	A0A0B4GDU5 -Metarhizium brunneum	Scytalone dehydratase-like protein Arp1	GO:0006582; P:melanin metabolic process; IEA:InterPro	Cj_Apopka97|V2A60_002564-T1; Cj_IJ2G|TQW06273.1	Scytalone dehydratase-like protein; part of the Pks2 gene cluster that mediates the formation of infectious structures (appressoria), enabling these fungi to kill insects faster	41
	cluster12432	2	P29787 - Aedes aegypti (Yellowfever mosquito)	Trypsin 5G1	GO:0007586; P:digestion; IEA:UniProtKB-KW	Cj_Apopka97|V2A60_009506-T1; Cj_IJ2G|TQW02890.1	Major function may be to aid in digestion of the blood meal	-
	cluster12321	2	A0A024FA41 - Lecanicillium sp	Fatty acid hydroxylase vlmA	GO:0009405; P:pathogenesis; IEA:UniProtKB-KW	Cj_Apopka97|V2A60_004183-T1; Cj_IJ2G|TQW02342.1	Fatty acid hydroxylase; part of the gene cluster that mediates the biosynthesis of verlamelin, a lipopeptide that exhibits antifungal activity against plant pathogenic fungi	47
	cluster12329	2	D4ALG0 - Arthroderma benhamiae	LysM domain-containing protein ARB_05157	GO:0009405; P:pathogenesis; IEA:UniProtKB-KW	Cj_Apopka97|V2A60_004542-T1; Cj_IJ2G|TQW03957.1	Might have a role in sequestration of chitin oligosaccharides (breakdown products of fungal cell walls that are released during invasion and act as triggers of host immunity) to dampen host defense	52
C. militaris	cluster12609	2	D4ALG0 - Arthroderma benhamiae	LysM domain-containing protein ARB_05157	GO:0009405; P:pathogenesis; IEA:UniProtKB-KW	Cm_34164|ATY61439.1; Cm_CM01|EGX88794.1	Might have a role in sequestration of chitin oligosaccharides (breakdown products of fungal cell walls that are released during invasion and act as triggers of host immunity) to dampen host defense	52
	cluster12808	2	D4ALG0 - Arthroderma benhamiae	LysM domain-containing protein ARB_05157	GO:0009405; P:pathogenesis; IEA:UniProtKB-KW	Cm_34164|ATY66588.1; Cm_CM01|EGX92283.1	Might have a role in sequestration of chitin oligosaccharides (breakdown products of fungal cell walls that are released during invasion and act as triggers of host immunity) to dampen host defense	52
	cluster12700	2	Q01109 - Streptomyces hygroscopicus	Acetyl-hydrolase	GO:0017000; P:antibiotic biosynthetic process; IEA:UniProtKB-KW	Cm_34164|ATY64132.1; Cm_CM01|EGX93048.1	This protein removes the N-acetyl group from bialaphos as one of the final steps of biosynthesis of phosphinothricin tripeptide (PTT), also known as bialaphos (BA), a natural-product antibiotic and potent herbicide	-
	cluster12533	2	Q5BCG1 - Emericella nidulans	3'(2'),5'-bisphosphate nucleotidase	GO:0000103; P:sulfate assimilation; IBA:GO_Central	Cm_34164|ATY60005.1; Cm_CM01|EGX94992.1	Phosphatase that converts adenosine 3'-phosphate 5'-phosphosulfate (PAPS) to adenosine 5'-phosphosulfate (APS) and 3'(2')-phosphoadenosine 5'- phosphate (PAP) to AMP. May regulate the flux of sulfur in the sulfur-activation pathway by converting PAPS to APS	-
E. festucae	cluster12858	2	K3VH30 - Fusarium pseudograminearum	Bifunctional cytokinin biosynthesis protein	GO:0009691; P:cytokinin biosynthetic process; IEA:UniProtKB-KW	Ef_Fl1|QPG93509.1; Ef_RoseCity|EfestucaeRoseCity_006234-T1	Bifunctional cytokinine synthesis protein; part of the gene cluster that mediates the biosynthesis of cytokinins such as fusatin, fusatinic acids or 8-oxofusatin, known for their growth promoting and anti-senescence activities toward host plants	58
	cluster12856	2	L0MXJ3 - Phomopsis amygdali	O-acetyltransferase PaAT-1	GO:0016747; F:transferase activity, transferring acyl groups other than amino-acyl groups; IEA:InterPro	Ef_Fl1|QPG93497.1; Ef_RoseCity|EfestucaeRoseCity_006222-T1	O-acetyltransferase; part of the 2 gene clusters that mediate the biosynthesis of fusicoccins, diterpene glucosides that display phytohormone-like activity and function as potent activators of plasma membrane H+-ATPases in plants by modifying 14-3-3 proteins and cause the plant disease constriction canker	59
	cluster12924	2	Q9M0A7 - Arabidopsis thaliana	Gamma-glutamyl peptidase 1	GO:0019760; P:glucosinolate metabolic process; IDA:TAIR	Ef_Fl1|QPG95512.1; Ef_RoseCity|EfestucaeRoseCity_002730-T1	Involved in glucosinolate biosynthesis. Hydrolyzes the gamma-glutamyl peptide bond of several glutathione (GSH) conjugates to produce Cys-Gly conjugates related to glucosinolates. The gamma-Glu-Cys-Gly-GSH conjugates are the sulfur-donating molecule in glucosinolate biosynthesis. Can use the GSH conjugate of the camalexin intermediate IAN (GS-IAN) as substrate. Required for the biosynthesis of ca…	60, 61
M. brunneum	cluster13550	2	D4AM78 - Arthroderma benhamiae	Chitin deacetylase	GO:0000272; P:polysaccharide catabolic process; IEA:UniProtKB-KW	Mb_3297|KID72353.1; Mb_4556|QLI73828.1	Hydrolyzes the N-acetamido groups of N-acetyl-D-glucosamine residues in chitin to form chitosan and acetate	-
	cluster13612	2	Q7YTY6 - Drosophila melanogaster (Fruit fly)	Serine protease inhibitor 42Dd	GO:0002784; P:regulation of antimicrobial peptide production; IMP:FlyBase	Mb_3297|KID72914.1; Mb_4556|QLI63919.1	Serine protease inhibitor with activity toward trypsin. Involved in innate immunity to fungal infection by negatively regulating the Toll signaling pathway and suppressing the expression of the antifungal peptide drosomycin. May function specifically in the GNBP3-dependent beta-1,3-glucan branch of the Toll pathway	62
	cluster13135	2	P37967 - Bacillus subtilis	Para-nitrobenzyl esterase	GO:0004104; F:cholinesterase activity; IEA:InterPro	Mb_3297|KID59640.1; Mb_4556|QLI70114.1	Catalyzes hydrolysis of several beta-lactam antibiotic PNB esters to the corresponding free acid and PNB alcohol	-
	cluster14106	2	A0MTQ2 - Sphingosinicella microcystinivorans	Beta-peptidyl aminopeptidase BapA	GO:0004177; F:aminopeptidase activity; IEA:UniProtKB-KW	Mb_3297|KID77867.1; Mb_4556|QLI67056.1	Beta-aminopeptidase that can cleave synthetic beta-peptides which consist of backbone-elongated beta-amino acid residues that are not processed by common proteolytic enzymes. Can cleave the beta-peptides beta-homoVal-beta-homoAla-beta-homoLeu and beta-homoAla-beta-homoLeu. S.microcystinivorans can degrade microcystin, a cyclic, toxic heptapeptide that contains beta-peptidic substructures	63
	cluster13516	2	P29118 -Hapsidospora chrysogena	Alkaline proteinase	GO:0004252; F:serine-type endopeptidase activity; IEA:InterPro	Mb_3297|KID72141.1; Mb_4556|QLI63741.1	Alkaline proteinase	-
	cluster13582	2	Q03420 - Hypocrea atroviridis	Alkaline proteinase prb1	GO:0004252; F:serine-type endopeptidase activity; IEA:InterPro	Mb_3297|KID72707.1; Mb_4556|QLI72552.1	Serine protease, secreted specifically during the mycoparasitic process, which is involved in the degradation of phytopathogen cell walls, membranes and of the proteins released after lysis of the host	64
	cluster13774	2	P16588 - Vibrio alginolyticus	Alkaline serine exoprotease A	GO:0004252; F:serine-type endopeptidase activity; IEA:InterPro	Mb_3297|KID74172.1; Mb_4556|QLI72509.1	Alkaline serine exoprotease A	-
	cluster14006	2	O31788 - Bacillus subtilis	Serine protease AprX	GO:0004252; F:serine-type endopeptidase activity; IEA:InterPro	Mb_3297|KID76099.1; Mb_4556|QLI71257.1	Serine protease AprX. Displays serine protease activity. Seems to have a broad substrate specificity	65
	cluster14008	2	P06873 - Parengyodontium album	Proteinase K	GO:0004252; F:serine-type endopeptidase activity; IEA:InterPro	Mb_3297|KID76101.1; Mb_4556|QLI70809.1	Proteinase K. Hydrolyzes keratin at aromatic and hydrophobic residues	-
	cluster11068	3	E4USP0 - Arthroderma gypseum	Extracellular metalloprotease MGYG_03559	GO:0009405; P:pathogenesis; IEA:UniProtKB-KW	Mb_3297|KID65425.1; Mb_4556|QLI67239.1; Mb_4556|QLI69016.1	Secreted metalloproteinase that allows assimilation of proteinaceous substrates. Plays a pivotal role as a pathogenicity determinant during infections and contributes to the ability of the pathogen to persist within the mammalian host	-
	cluster13476	2	D4AL88 - Arthroderma benhamiae	Probable extracellular metalloproteinase 3	GO:0009405; P:pathogenesis; IEA:UniProtKB-KW	Mb_3297|KID70318.1; Mb_4556|QLI72662.1	Secreted metalloproteinase probably acting as a virulence factor	-
	cluster13926	2	C4JUE5 - Uncinocarpus reesii	Sphingomyelinase D	GO:0009405; P:pathogenesis; IEA:UniProtKB-KW	Mb_3297|KID75486.1; Mb_4556|QLI67481.1	Catalyzes the hydrolysis of sphingomyelin. Sphingomyelinases D are produced by some spider in their venoms, but also by arthropods such as ticks, or pathogenic bacteria and fungi. They might play a role in pathogenicity through different mechanisms, such as membrane destabilization and host cell penetration, but also pulmonary inflammation and cutaneous lesions	-
	cluster13941	2	P34024 - Listeria monocytogenes	1-phosphatidylinositol phosphodiesterase	GO:0009405; P:pathogenesis; IEA:UniProtKB-KW	Mb_3297|KID75638.1; Mb_4556|QLI68151.1	Cleaves glycosylphosphatidylinositol (GPI) and phosphatidylinositol (PI) anchors but not PI phosphates. Important factor in pathogenesis, PI-PLC activity is present only in virulent listeria species. It may participate in the lysis of the phagolysosomal membrane	66
	cluster13551	2	F1DBB4 - Penicillium brevicompactum	Type I acyl-CoA thioesterase mpaH	GO:0016114; P:terpenoid biosynthetic process; IEA:UniProtKB-UniPathway	Mb_3297|KID72361.1; Mb_4556|QLI73346.1	Type I acyl-CoA thioesterase; part of the gene cluster that mediates the biosynthesis of mycophenolic acid (MPA), the first isolated antibiotic natural product in the world obtained from a culture of Penicillium brevicompactum in 1893	48
	cluster13703	2	Q0D1P7 - Aspergillus terreus	NAD-dependent epimerase/dehydratase terH	GO:0016491; F:oxidoreductase activity; IEA:UniProtKB-KW	Mb_3297|KID73822.1; Mb_4556|QLI63618.1	NAD-dependent epimerase/dehydratase; part of the gene cluster that mediates the biosynthesis of terrein, a fungal metabolite with ecological, antimicrobial, antiproliferative, and antioxidative activities	67
	cluster11073	3	S3D9F1 - Glarea lozoyensis	Highly reducing polyketide synthase gloL	GO:0016746; F:transferase activity, transferring acyl groups; IEA:UniProtKB-KW	Mb_3297|KID67762.1; Mb_4556|QLI72795.1; Mb_4556|QLI74252.1	Highly reducing polyketide synthase; part of the gene cluster that mediates the biosynthesis of pneumocandins, lipohexapeptides of the echinocandin family that prevent fungal cell wall formation by non-competitive inhibition of beta-1,3-glucan synthase	68
	cluster13711	2	G0R6S9 - Trichoderma reesei	Non-reducing polyketide synthase sor2	GO:0016746; F:transferase activity, transferring acyl groups; IEA:UniProtKB-KW	Mb_3297|KID73862.1; Mb_4556|QLI63539.1	Non-reducing polyketide synthase; part of the SOR gene cluster that mediates the biosynthesis of sorbicillinoids, a diverse group of yellow secondary metabolites that restrict growth of competing pathogenic fungi but not of bacteria	44
	cluster14158	2	A0A075TXZ3 - Penicillium expansum	Carboxylesterase patB	GO:0016787; F:hydrolase activity; IEA:UniProtKB-KW	Mb_3297|KID78770.1; Mb_4556|QLI66040.1	Carboxylesterase; part of the gene cluster that mediates the biosynthesis of patulin, an acetate-derived tetraketide mycotoxin produced by several fungal species that shows antimicrobial properties against several bacteria	69
	cluster13417	2	Q0PCD7 - Streptomyces galilaeus	Aclacinomycin-N/aclacinomycin-A oxidase	GO:0017000; P:antibiotic biosynthetic process; IEA:UniProtKB-KW	Mb_3297|KID67844.1; Mb_4556|QLI73899.1	Involved in the modification of the terminal sugar residues in the last two steps in the biosynthesis of polyketide antibiotics of the aclacinomycin group	70
	cluster13484	2	A0A1B4XBH3 - Sordaria araneosa	Highly reducing polyketide synthase sdnO	GO:0017000; P:antibiotic biosynthetic process; IEA:UniProtKB-KW	Mb_3297|KID71992.1; Mb_4556|QLI65843.1	Highly reducing polyketide synthase; part of the gene cluster that mediates the biosynthesis of sordarin and hypoxysordarin, glycoside antibiotics with a unique tetracyclic diterpene aglycone structure	71
	cluster13795	2	Q643C8 - Streptomyces hygroscopicus	Phenylpyruvate C(3)-methyltransferase	GO:0017000; P:antibiotic biosynthetic process; IEA:UniProtKB-KW	Mb_3297|KID74283.1; Mb_4556|QLI71745.1	S-adenosyl-L-methionine-dependent methyltransferase involved in synthesis of the nonproteinogenic amino acid (2S,3S)-beta-methyl-phenylalanine, a building block of the antibiotic mannopeptimycin	72
	cluster10458	4	Q4WR24 - Aspergillus fumigatus	3-ketosteroid 1-dehydrogenase helE	GO:0019748; P:secondary metabolic process; IGC:AspGD	Mb_3297|KID63604.1; Mb_3297|KID65420.1; Mb_4556|QLI69019.1; Mb_4556|QLI69151.1	3-ketosteroid 1-dehydrogenase; part of the gene cluster that mediates the biosynthesis of helvolic acid, an antibacterial nortriterpenoid	73
	cluster13331	2	Q4WR17 - Aspergillus fumigatus	Cytochrome P450 monooxygenase helB1	GO:0019748; P:secondary metabolic process; IGC:AspGD	Mb_3297|KID65414.1; Mb_4556|QLI68764.1	Cytochrome P450 monooxygenase; part of the gene cluster that mediates the biosynthesis of helvolic acid, an antibacterial nortriterpenoid
	cluster13332	2	Q4WR22 - Aspergillus fumigatus	Cytochrome P450 monooxygenase helB4	GO:0019748; P:secondary metabolic process; IGC:AspGD	Mb_3297|KID65415.1; Mb_4556|QLI69513.1	Cytochrome P450 monooxygenase; part of the gene cluster that mediates the biosynthesis of helvolic acid, an antibacterial nortriterpenoid
	cluster13334	2	Q4WR19 - Aspergillus fumigatus	Short chain dehydrogenase helC	GO:0019748; P:secondary metabolic process; IGC:AspGD	Mb_3297|KID65417.1; Mb_4556|QLI69668.1	Short chain dehydrogenase; part of the gene cluster that mediates the biosynthesis of helvolic acid, an antibacterial nortriterpenoid
	cluster13335	2	Q4WR18 - Aspergillus fumigatus	Cytochrome P450 monooxygenase helB2	GO:0019748; P:secondary metabolic process; IGC:AspGD	Mb_3297|KID65418.1; Mb_4556|QLI68866.1	Cytochrome P450 monooxygenase; part of the gene cluster that mediates the biosynthesis of helvolic acid, an antibacterial nortriterpenoid
	cluster13336	2	Q4WR23 - Aspergillus fumigatus	Acyltransferase helD2	GO:0019748; P:secondary metabolic process; IGC:AspGD	Mb_3297|KID65419.1; Mb_4556|QLI69621.1	Acyltransferase; part of the gene cluster that mediates the biosynthesis of helvolic acid, an antibacterial nortriterpenoid
	cluster13337	2	Q4WR21 - Aspergillus fumigatus	Acyltransferase helD1	GO:0019748; P:secondary metabolic process; IGC:AspGD	Mb_3297|KID65421.1; Mb_4556|QLI69776.1	Acyltransferase; part of the gene cluster that mediates the biosynthesis of helvolic acid, an antibacterial nortriterpenoid
	cluster13338	2	Q4WR20 - Aspergillus fumigatus	Cytochrome P450 monooxygenase helB3	GO:0019748; P:secondary metabolic process; IGC:AspGD	Mb_3297|KID65422.1; Mb_4556|QLI69831.1	Cytochrome P450 monooxygenase; part of the gene cluster that mediates the biosynthesis of helvolic acid, an antibacterial nortriterpenoid
	cluster13925	2	C8VJR7 - Emericella nidulans	Highly reducing polyketide synthase alnA	GO:0019748; P:secondary metabolic process; NAS:AspGD	Mb_3297|KID75467.1; Mb_4556|QLI69925.1	Highly reducing polyketide synthase; part of the gene cluster that mediates the biosynthesis of asperlin, a polyketide showing anti-inflammatory, antitumor and antibiotic activities	51
	cluster13808	2	P17405 - Homo sapiens (Human)	Sphingomyelin phosphodiesterase	GO:0023021; P:termination of signal transduction; IMP:BHF-UCL	Mb_3297|KID74353.1; Mb_4556|QLI72717.1	Converts sphingomyelin to ceramide	74
	cluster10494	4	P00782 - Bacillus amyloliquefaciens	Subtilisin BPN'	GO:0030435; P:sporulation resulting in formation of a cellular spore; IEA:UniProtKB-KW	Mb_3297|KID72209.1; Mb_3297|KID79732.1; Mb_4556|QLI64453.1; Mb_4556|QLI73662.1	Subtilisin is an extracellular alkaline serine protease, it catalyzes the hydrolysis of proteins and peptide amides. Has a high substrate specificity to fibrin	75
	cluster11078	3	A0JJU1 - Beauveria bassiana	Tenellin synthetase	GO:0031177; F:phosphopantetheine binding; IEA:InterPro	Mb_3297|KID73294.1; Mb_4556|QLI69086.1; Mb_4556|QLI73366.1	Hybrid PKS-NRPS synthetase; part of the gene cluster that mediates the biosynthesis of tenellin-type 2-pyridones, iron-chelating compounds involved in iron stress tolerance, competition with the natural competitor fungus Metarhizium robertsii and insect hosts infection	76
	cluster13873	2	Q2UPC0 - Aspergillus oryzae	ABC transporter aclQ	GO:0036246; P:phytochelatin 2 import into vacuole; IEA:EnsemblFungi	Mb_3297|KID74877.1; Mb_4556|QLI74410.1	ABC transporter; part of the gene cluster that mediates the biosynthesis of aspirochlorine (or antibiotic A30641), an unusual halogenated spiro compound with distinctive antifungal properties due to selective inhibition of protein biosynthesis, and which is also active against bacteria, viruses, and murine tumor cells	55
	cluster10481	4	B6A878 - Yersinia entomophaga	Toxin subunit YenA2	N/A	Mb_3297|KID66960.1; Mb_3297|KID75530.1; Mb_4556|QLI66695.1; Mb_4556|QLI71331.1	Part of an orally active toxin complex (TC) with strong insecticidal effects on larvae of the Coleoptera Costelytra zealandica, Acrossidius tasmania and Adoryphorus couloni and some Lepidoptera larvae. The TC has an endochitinase activity	77
	cluster13861	2	Q2UPB6 - Aspergillus oryzae	Aspirochlorine biosynthesis protein N	N/A	Mb_3297|KID74807.1; Mb_4556|QLI74127.1	Part of the gene cluster that mediates the biosynthesis of aspirochlorine (or antibiotic A30641), an unusual halogenated spiro compound with distinctive antifungal properties due to selective inhibition of protein biosynthesis, and which is also active against bacteria, viruses, and murine tumor cells	55
T. reesei	cluster14825	2	Q9URY7 - Schizosaccharomyces pombe	Putative formamidase C869.04	GO:0004328; F:formamidase activity; IEA:UniProtKB-EC	Tr_CBS999|TreeseiCBS999.97_006231-T1; Tr_QM6a|TreeseiQM6a_006306-T1	Hydrolyzes formamide with the production of ammonia which can be used as a source of nitrogen for growth. May also act on acetamide, propanamide and butanamide	-
	cluster10616	4	O95154 - Homo sapiens (Human)	Aflatoxin B1 aldehyde reductase member 3	GO:0006805; P:xenobiotic metabolic process; TAS:Reactome	Tr_CBS999|TreeseiCBS999.97_003625-T1; Tr_CBS999|TreeseiCBS999.97_009188-T1; Tr_QM6a|TreeseiQM6a_003659-T1; Tr_QM6a|TreeseiQM6a_008253-T1	Can reduce the dialdehyde protein-binding form of aflatoxin B1 (AFB1) to the non-binding AFB1 dialcohol. May be involved in protection of liver against the toxic and carcinogenic effects of AFB1, a potent hepatocarcinogen	78
	cluster14642	2	B6GX22 - Penicillium rubens	Mutanase Pc12g07500	GO:0008152; P:metabolic process; IEA:UniProtKB-KW	Tr_CBS999|TreeseiCBS999.97_004610-T1; Tr_QM6a|TreeseiQM6a_004661-T1	Hydrolyzes 1,3-alpha-glucan predominantly into pentasaccharides. May enhance the efficacy of fungal antibiotics by degrading bacterial exopolysaccharides	79
	cluster14350	2	D7PI10 - Penicillium aethiopicum	Transcription factor gsfR2	GO:0008270; F:zinc ion binding; IEA:InterPro	Tr_CBS999|TreeseiCBS999.97_000521-T1; Tr_QM6a|TreeseiQM6a_000521-T1	Transcription factor that regulates expression of the gene cluster that mediates the biosynthesis of Griseofulvin, an important antifungal drug that has been in use for a long time for treating dermatophyte infections	80
	cluster14677	2	P79381 - Sus scrofa (Pig)	Epoxide hydrolase 1	GO:0009636; P:response to toxic substance; IEA:UniProtKB-KW	Tr_CBS999|TreeseiCBS999.97_004934-T1; Tr_QM6a|TreeseiQM6a_004988-T1	Biotransformation enzyme that catalyzes the hydrolysis of arene and aliphatic epoxides to less reactive and more water soluble dihydrodiols by the trans addition of water. May play a role in the metabolism of endogenous lipids such as epoxide-containing fatty acids	-
	cluster11111	3	F1DBA9 - Penicillium brevicompactum	Non-reducing polyketide synthase mapC	GO:0016114; P:terpenoid biosynthetic process; IEA:UniProtKB-UniPathway	Tr_CBS999|TreeseiCBS999.97_004914-T1; Tr_CBS999|TreeseiCBS999.97_004915-T1; Tr_QM6a|TreeseiQM6a_004970-T1	Non-reducing polyketide synthase; part of the gene cluster that mediates the biosynthesis of mycophenolic acid (MPA), the first isolated antibiotic natural product in the world obtained from a culture of Penicillium brevicompactum in 1893	48
	cluster14447	2	P31434 - Escherichia coli	Alpha-xylosidase	GO:0016139; P:glycoside catabolic process; IBA:GO_Central	Tr_CBS999|TreeseiCBS999.97_001861-T1; Tr_QM6a|TreeseiQM6a_001874-T1	Can catalyze the transfer of alpha-xylosyl residue from alpha-xyloside to xylose, glucose, mannose, fructose, maltose, isomaltose, nigerose, kojibiose, sucrose and trehalose	81
	cluster14933	2	D7UTD0 - Phomopsis amygdali	Short-chain dehydrogenase/reductase	GO:0016491; F:oxidoreductase activity; IEA:UniProtKB-KW	Tr_CBS999|TreeseiCBS999.97_007735-T1; Tr_QM6a|TreeseiQM6a_008785-T1	Short-chain dehydrogenase/reductase; part of the 2 gene clusters that mediate the biosynthesis of fusicoccins, diterpene glucosides that display phytohormone-like activity and function as potent activators of plasma membrane H+-ATPases in plants by modifying 14-3-3 proteins and cause the plant disease constriction canker	59
	cluster14993	2	S0DXU0 - Gibberella fujikuroi	Trans-enoyl reductase	GO:0016491; F:oxidoreductase activity; IEA:UniProtKB-KW	Tr_CBS999|TreeseiCBS999.97_008274-T1; Tr_QM6a|TreeseiQM6a_007334-T1	Hybrid PKS-NRPS synthetase; part of the gene cluster that mediates the biosynthesis of trichosetin, a trans-fused decalin-containing tetramic acid with antimicrobial activity	82
	cluster14517	2	A0A1B4XBH6 - Sordaria araneosa	Glycosyltransferase sdnJ	GO:0017000; P:antibiotic biosynthetic process; IEA:UniProtKB-KW	Tr_CBS999|TreeseiCBS999.97_002607-T1; Tr_QM6a|TreeseiQM6a_002621-T1	Glycosyltransferase; part of the gene cluster that mediates the biosynthesis of sordarin and hypoxysordarin, glycoside antibiotics with a unique tetracyclic diterpene aglycone structure	71
	cluster14496	2	O87833 - Streptomyces antibioticus	L-olivosyl-oleandolide 3-O-methyltransferase	GO:0032259; P:methylation; IDA:UniProtKB	Tr_CBS999|TreeseiCBS999.97_002265-T1; Tr_QM6a|TreeseiQM6a_002279-T1	3-O-methyltransferase involved in the synthesis of L-oleandrose, a sugar attached to oleandomycin, a macrolide antibiotic	83
