# Supplementary material for: Discovery of a novel fungal Tc toxin complex and a functional myco- serpin via a unique two-by-two comparative genomics pipeline
Source: Research Square preprint supplement (doi:10.21203/rs.3.rs-6005389/v1), 2025-03-21
Supplement: Supplementary file 4 [file c3e97b052aa4aca5f82f044f.xlsx]

## Sheet: Sheet1
Species	Cluster ID	Number of Proteins in cluster	Swiss-Prot Hit (Entry - Species)	Swiss-Prot Hit Protein Name	Members of Cluster	Function	Reference
B.bassiana	cluster10663	3	OPS1 - Beauveria bassiana	Orsellinic acid synthase	Bb_ERL836|KAF1732856.1; Bb_JEF-350|KAH8713103.1; Bb_JEF-350|KAH8713104.1	Gene cluster that mediates the biosynthesis of the bibenzoquinone oosporein, a metabolite required for fungal virulence that acts by evading host immunity to facilitate fungal multiplication in insects	36
	cluster11284	2	OPS7 - Beauveria bassiana	Oxidoreductase OpS7	Bb_ERL836|KAF1732862.1; Bb_JEF-350|KAH8713097.1
	cluster11283	2	J5J924 - Beauveria bassiana	MFS transporter OpS2	Bb_ERL836|KAF1732858.1;Bb_JEF-350|KAH8713102.1
	cluster11282	2	OPS3 - Beauveria bassiana	Oosporein cluster regulator OpS3	Bb_ERL836|KAF1732857.1; Bb_JEF-350|KAH8713101.1
C. militaris	cluster12734	2	No hit		Cm_34164|ATY65128.1; Cm_CM01|EGX93064.1	Product encoded by gene CNS1 of the Cordycepin biosynthetic gene cluster	37
	cluster12735	2	O05502 - Bacillus subtilis	Uncharacterized protein YdhJ	Cm_34164|ATY65129.1; Cm_CM01|EGX93065.1	Product encoded by gene CNS2 of the Cordycepin biosynthetic gene cluster
	cluster12736	2	No hit		Cm_34164|ATY65134.1; Cm_CM01|EGX93066.1	Product encoded by gene CNS3 of the Cordycepin biosynthetic gene cluster
M. brunneum	cluster13200	2	P29138 - Metarhizium anisopliae	Cuticle-degrading protease PR1	Mb_3297|KID60942.1; Mb_4556|QLI68484.1	Cuticle-degrading protease, Chymoelastase, PR1. Capable of breaching the insect cuticle	38
	cluster13207	2	L8G6I7 - Pseudogymnoascus destructans	Subtilisin-like protease 1	Mb_3297|KID61215.1; Mb_4556|QLI74370.1	Major secreted subtilisin-like serine endopeptidase. Degrades the nonhelical regions of collagen that function in the cross-linking of the helical components	39, 40
	cluster13386	2	L8GD75 - Pseudogymnoascus destructans	Subtilisin-like protease 3	Mb_3297|KID66974.1; Mb_4556|QLI70477.1	Major secreted subtilisin-like serine endopeptidase. Degrades the nonhelical regions of collagen that function in the cross-linking of the helical components	39, 40
	cluster13323	2	A0A0B4GDU5 - Metarhizium brunneum	Scytalone dehydratase-like protein Arp1	Mb_3297|KID65390.1; Mb_4556|QLI69143.1	Scytalone dehydratase-like protein; part of the Pks2 gene cluster that mediates the formation of infectious structures (appressoria), enabling these fungi to kill insects faster	41
	cluster13990	2	D4AX50 - Arthroderma benhamiae	Subtilisin-like protease 8	Mb_3297|KID76020.1; Mb_4556|QLI67847.1	Secreted subtilisin-like serine protease with keratinolytic activity that contributes to pathogenicity	40
	cluster10467	4	E9F8M0 - Metarhizium robertsii	Transmembrane transporter swnT	Mb_3297|KID64719.1; Mb_3297|KID73970.1; Mb_4556|QLI68254.1; Mb_4556|QLI74702.1	Gene cluster that mediates the biosynthesis of swainsonine, a cytotoxic fungal alkaloid and a potential cancer therapy drug.	42
	cluster13587	2	D4AU27 - Arthroderma benhamiae	Swainsonine transporter swnT	Mb_3297|KID72725.1; Mb_4556|QLI71645.1
	cluster10517	4	D4AU26 - Arthroderma benhamiae	Dioxygenase swnH1	Mb_3297|KID73870.1; Mb_3297|KID73969.1; Mb_4556|QLI67169.1; Mb_4556|QLI67423.1
	cluster13740	2	E9F8M4 - Metarhizium robertsii	Dioxygenase swnH2	Mb_3297|KID73974.1; Mb_4556|QLI68135.1
T. reesei	cluster14860	2	G0R6S7 - Trichoderma reesei	Short chain dehydrogenase sor7	Tr_CBS999|TreeseiCBS999.97_006656-T1; Tr_QM6a|TreeseiQM6a_006735-T1	Short chain dehydrogenase; part of the SOR gene cluster that mediates the biosynthesis of sorbicillinoids, a diverse group of yellow secondary metabolites that restrict growth of competing pathogenic fungi but not of bacteria.	43
E. festucae	cluster12871	2	A0A024FA41 - Lecanicillium sp	Fatty acid hydroxylase vlmA	Ef_Fl1|QPG93928.1; Ef_RoseCity|EfestucaeRoseCity_000440-T1	Fatty acid hydroxylase; part of the gene cluster that mediates the biosynthesis of verlamelin, a lipopeptide that exhibits antifungal activity against plant pathogenic fungi. This gene product has previously been observed in E. festucae and has been detected in E. festucae infected Festuca rubra	44
	cluster13039	2	A0A024F910 - Lecanicillium sp	Nonribosomal peptide synthetase vlms	Ef_Fl1|QPH06327.1; Ef_RoseCity|EfestucaeRoseCity_000031-T1
