# Supplementary material for: Discovery of a novel fungal Tc toxin complex and a functional myco- serpin via a unique two-by-two comparative genomics pipeline
Source: Research Square preprint supplement (doi:10.21203/rs.3.rs-6005389/v1), 2025-03-21
Supplement: Supplementary file 5 [file d320639296e735901d590513.docx]

**Supplementary File 5: PCR primers used to generate *M. brunneum* serpin and Tc toxin knockout strains**

| **Primers** | **Sequence** | **Note** |
| --- | --- | --- |
| MBR_07878-UF | CTGCAGCCCGGGGGATCC CCATTGTGGCGAAGATGTGTC | Amplifying 5’-flanking region |
| MBR_07878-UR | CAATATCATCTTCTGTCGAC GATGATGATGATGAGGCGGC |
| MBR_07878-DF | CACCGAGATCTGATGAACTAGT CCAGGTGTAAGCAAGCAAGC | Amplifying 3’-flanking region |
| MBR_07878-DR | TGGCGGCCGCTCTAGAACTAGT CCATACTCATCCAGTCGCCT |
| MBR-07878-OF | AATCGCAAGGCACATTCTCC | Verification of gene deletion |
| MBR-07878-OR | CGGGCTCCGTAAGTTCTGTT |
| MBR-07878-IF | CCGACATAAATGCGTGGAT |
| MBR-07878-IR | GGCAGATAGGCGAAGAGC |
| MBR_09287-UF | CTGCAGCCCGGGGGATCC TATATCGGCAGTTCAGCAGC | Amplifying 5’-flanking region |
| MBR_09287-UR | CAATATCATCTTCTGTCGAC GGCAACTGTGATTGCCAGTG |
| MBR_09287-DF | CACCGAGATCTGATGAACTAGT AGTCTCTCCGAACCGCAACA | Amplifying 3’-flanking region |
| MBR_09287-DR | TGGCGGCCGCTCTAGAACTAGT AAGACGGCGATGCGGTAGA |
| MBR-09287-OF | AAGACACGACCTGGCACTAG | Verification of gene deletion |
| MBR-09287-OR | ACCAAACAGCACCATCACG |
| MBR-09287-IF | GCTTGATAGAGCCGTGTCGT |
| MBR-09287-IR | GCCGTCCACGCTTGTTC |
