# Supplementary material for: Discovery of a novel fungal Tc toxin complex and a functional myco- serpin via a unique two-by-two comparative genomics pipeline
Source: Research Square preprint supplement (doi:10.21203/rs.3.rs-6005389/v1), 2025-03-21
Supplement: Supplementary file 6 [file de7598768e38cad657e9ad1c.xlsx]

## Sheet: Sheet1
Species	Family	Isolate	Assembly Accession	Release Year	Total Length	Scaffolds (contigs)	N50	Full Chromosomes (plasmids)	Predicted Proteins	Protein Busco (N = 4494)
Cordyceps javanica	Cordycipitaceae	Apopka 97	SUB14178129	2024	35.14	-	-	7 (1)	10469	0.969
Cordyceps javanica		IJ2G	GCA_006981975.1	2019	34.97	173 (658)	1822545	0	11142	0.944
Cordyceps fumosorosea		ARSEF 2679	GCA_001636725.1	2016	33.49	430 (685)	872179	0	10061	0.956
Cordyceps fumosorosea		grCorFumo1	GCA_963580265.1	2023	34.32	-	-	9 (1)	*10158	0.94
Cordyceps militaris		ATCC 34164	GCA_008080495.1	2017	33.62	-	-	7 (0)	9287	0.924
Cordyceps militaris		CM01	GCA_000225605.1	2011	32.27	32 (597)	4551492	0	9651	0.959
Cordyceps cateniannulata		FRD 24	GCA_028828415.1	2023	33.63	0 (16)	4260819	0	*10850	0.969
Cordyceps cateniannulata		MBC 234	GCA_030411495.1	2023	33.99	0 (1,338)	104394	0	*11452	0.959
Beauvaria bassiana		ERL836	GCA_010099065.1	2020	35.4	0 (14)	3988868	0	10399	0.913
Beauvaria bassiana		JEF-350	GCA_021365345.1	2022	35.7	0 (8)	5649914	0	7829	0.955
Metarhizium brunneum	Clavicipitaceae	ARSEF 4556	GCA_013426205.1	2020	37.8	-	-	7 (1)	11420	0.991
Metarhizium brunneum		ARSEF 3297	GCF_000814965.1	2015	37.1	92 (180)	1825569	0	10689	0.971
Epichloe festucae		Fl1	GCA_003814445.1	2018	35	-	-	7 (1)	7034	0.874
Epichloe festucae		RoseCity	GCA_016859245.1	2021	31	0 (19)	2735662	0	*6979	0.845
Trichoderma reesei	Hypocreaceae	CBS999.97	GCA_016806755.1	2021	34.3	-	-	7 (0)	*9196	0.987
Trichoderma reesei		QM6a	GCA_002006585.1	2017	34.9	-	-	7 (0)	*9298	0.98
		Bold Isolate = RefSeq						* = Gene predictions performed in this study
